# Contents

## Oral Presentations

### 7 July 2008

|             |                                                                                      |     |
|-------------|--------------------------------------------------------------------------------------|-----|
| O-001-O-002 | Session 01 – Keynote lectures . . . . .                                              | i1  |
| O-003-O-008 | Session 02 – Endocrinology . . . . .                                                 | i2  |
| O-009-O-014 | Session 03 – Psychology . . . . .                                                    | i4  |
| O-015-O-020 | Session 04 – Early pregnancy . . . . .                                               | i7  |
| O-021-O-026 | Session 05 – Reproductive surgery . . . . .                                          | i9  |
| O-027-O-032 | Session 06 – Embryology . . . . .                                                    | i12 |
| O-033-O-038 | Session 07 – Female fertility - Clinical aspects (1) . . . . .                       | i14 |
| O-039-O-040 | Session 08 – Progesterone receptor modulators . . . . .                              | i17 |
| O-041       | Session 09 – FSA Exchange session . . . . .                                          | i17 |
| O-042-O-043 | Session 10 – Paramedical invited lectures - Nursing . . . . .                        | i18 |
| O-044-O-045 | Session 11 – Prepatterning in mammalian preimplantation embryo development . . . . . | i19 |
| O-046-O-047 | Session 12 – Infertility services in poorly resourced countries . . . . .            | i19 |
| O-048-O-051 | Session 13 – Paramedical selected oral presentations - Nursing . . . . .             | i20 |
| O-052-O-056 | Session 14 – ART - Clinical - Procedures . . . . .                                   | i22 |
| O-057-O-061 | Session 15 – ART - Clinical - IUI (1) . . . . .                                      | i24 |
| O-062-O-066 | Session 16 – ART - Clinical - Prognostic factors (1) . . . . .                       | i26 |
| O-067-O-071 | Session 17 – Endometrium . . . . .                                                   | i28 |
| O-072-O-076 | Session 18 – Genetics - Male . . . . .                                               | i30 |
| O-077-O-081 | Session 19 – ART - Laboratory - Cryopreservation of gametes . . . . .                | i32 |
| O-082-O-083 | Session 20 – Angiogenesis - from bench to bedside . . . . .                          | i35 |
| O-084-O-085 | Session 21 – The preimplantation embryo - from morphology to genes . . . . .         | i35 |
| O-086-O-089 | Session 22 – Ethics . . . . .                                                        | i36 |

### 8 July 2008

|             |                                                                                                   |     |
|-------------|---------------------------------------------------------------------------------------------------|-----|
| O-090-O-091 | Session 23 – Adenomyosis (Clinical tutorial) . . . . .                                            | i38 |
| O-092-O-093 | Session 24 – Vitrification - as clear as glass? . . . . .                                         | i38 |
| O-094-O-095 | Session 25 – ASRM/SMRU - State of the art - Diagnosis and treatment of male infertility . . . . . | i39 |
| O-096-O-097 | Session 26 – Paramedical invited lectures - Laboratory . . . . .                                  | i40 |
| O-098-O-103 | Session 27 – ART - Clinical - Outcome (1) . . . . .                                               | i40 |
|             | Session 28 – Live surgery . . . . .                                                               | i43 |
| O-104-O-109 | Session 29 – Early pregnancy - Clinical aspects . . . . .                                         | i43 |
| O-110-O-115 | Session 30 – ART - Clinical - Single embryo transfer . . . . .                                    | i45 |
| O-116-O-121 | Session 31 – ART - Laboratory - Cryopreservation of embryos and gonads . . . . .                  | i48 |
| O-122-O-127 | Session 32 – Epidemiology . . . . .                                                               | i51 |
| O-128-O-129 | Session 33 – Molecular analysis of preimplantation embryos using microarrays . . . . .            | i53 |
| O-130-O-131 | Session 34 – Male’s sexual health . . . . .                                                       | i54 |
| O-132-O-135 | Session 35 – Paramedical selected oral presentations - Laboratory . . . . .                       | i54 |
| O-136       | Session 36 – Postmenopausal pregnancy (Debate) . . . . .                                          | i56 |
| O-137-O-138 | Session 37 – Data from the ESHRE PGD Consortium . . . . .                                         | i56 |
| O-139-O-141 | Session 38 – ESHRE Guidelines session . . . . .                                                   | i57 |
| O-142-O-143 | Session 39 – Paramedical invited lectures -Laboratory . . . . .                                   | i57 |
| O-144-O-148 | Session 40 – ART - Clinical - Ovarian stimulation (1) . . . . .                                   | i58 |
| O-149-O-153 | Session 41 – ART - Clinical - Risks and complications . . . . .                                   | i60 |
| O-154-O-158 | Session 42 – ART - Clinical - IUI (2) . . . . .                                                   | i62 |
| O-159-O-163 | Session 43 – Endometriosis: basic research . . . . .                                              | i64 |
| O-164-O-168 | Session 44 – Genetics - PGD/PGS . . . . .                                                         | i66 |
| O-169-O-173 | Session 45 – Cryopreservation of oocyte and ovarian tissue . . . . .                              | i68 |

|             |                                                                |     |
|-------------|----------------------------------------------------------------|-----|
| O-174-O-177 | Session 46 – ICSI . . . . .                                    | i70 |
| O-178-O-181 | Session 47 – Prognostic factors . . . . .                      | i72 |
| O-182-O-185 | Session 48 – ART - Clinical - Follow-up of children . . . . .  | i74 |
| O-186-O-189 | Session 49 – Male fertility . . . . .                          | i76 |
| O-190-O-193 | Session 50 – Endometrium - Contraception . . . . .             | i77 |
| O-194-O-197 | Session 51 – Female fertility - clinical aspects (2) . . . . . | i79 |

**9 July 2008**

|             |                                                                                                            |      |
|-------------|------------------------------------------------------------------------------------------------------------|------|
| O-198-O-199 | Session 52 – Reproduction and cancer . . . . .                                                             | i80  |
| O-200       | Session 53 – European IVF monitoring . . . . .                                                             | i81  |
| O-201-O-202 | Session 54 – Early pregnancy and genetic developments . . . . .                                            | i81  |
| O-203-O-209 | Session 55 – From mice to robots . . . . .                                                                 | i82  |
| O-210-O-216 | Session 56 – ART - Laboratory - Procedures (1) . . . . .                                                   | i85  |
| O-217-O-220 | Session 57 – Patient session - The influence of national legislation on ART practice . . . . .             | i88  |
| O-221-O-227 | Session 58 – Fertility - Clinical aspects . . . . .                                                        | i89  |
| O-228-O-234 | Session 59 – ART - Stem cell research . . . . .                                                            | i92  |
| O-235-O-241 | Session 60 – Female fertility - Basic research . . . . .                                                   | i95  |
| O-242-O-243 | Session 61 – Contraception . . . . .                                                                       | i99  |
| O-244-O-245 | Session 62 – ASRM session - Bleeding problems at the extremes of life-evidence based information . . . . . | i99  |
| O-246-O-248 | Session 63 – Members’ information session . . . . .                                                        | i100 |
| O-249-O-250 | Session 64 – Paramedical invited session - Dictating patients’ life styles . . . . .                       | i100 |
| O-251-O-255 | Session 65 – ART - Clinical - Ovarian stimulation (2) . . . . .                                            | i101 |
| O-256-O-260 | Session 66 – Male fertility: basic research . . . . .                                                      | i103 |
| O-261-O-265 | Session 67 – ART - Clinical - Prognostic factors (2) . . . . .                                             | i105 |
| O-266-O-270 | Session 68 – Endometriosis - Clinical aspects . . . . .                                                    | i107 |
| O-271-O-275 | Session 69 – ART - Stem cell research (2). . . . .                                                         | i109 |
| O-276-O-280 | Session 70 – Genetics - Aneuploid sperm . . . . .                                                          | i111 |
|             | Session 71 – Late breaking research . . . . .                                                              | i113 |

**Poster Presentations**

|             |                                                        |      |
|-------------|--------------------------------------------------------|------|
| P-281-P-281 | Adolescence, puberty . . . . .                         | i114 |
| P-282-P-284 | ART, basic research: ICSI, MESA, TESE . . . . .        | i114 |
| P-285-P-287 | ART, basic research: IVM . . . . .                     | i116 |
| P-288-P-289 | ART, clinical: follow-up of children . . . . .         | i117 |
| P-290-P-293 | ART, clinical: GnRH agonist/antagonist . . . . .       | i118 |
| P-294-P-300 | ART, clinical: IUI . . . . .                           | i119 |
| P-301-P-313 | ART, clinical: outcome . . . . .                       | i122 |
| P-314-P-328 | ART, clinical: ovarian stimulation . . . . .           | i127 |
| P-329-P-329 | ART, clinical: pregnancy . . . . .                     | i133 |
| P-330-P-337 | ART, clinical: procedures . . . . .                    | i134 |
| P-338-P-349 | ART, clinical: prognostic factors . . . . .            | i136 |
| P-350-P-354 | ART, clinical: risks and complications . . . . .       | i141 |
| P-355-P-358 | ART, clinical: single embryo transfer . . . . .        | i143 |
| P-359       | ART, cloning . . . . .                                 | i145 |
| P-359-P-363 | ART, laboratory, cyropreservation of gonads . . . . .  | i145 |
| P-364-P-368 | ART, laboratory: cryopreservation of embryos . . . . . | i147 |
| P-369-P-375 | ART, laboratory: cryopreservation of gametes . . . . . | i149 |
| P-376-P-387 | ART, laboratory: embryo selection . . . . .            | i152 |
| P-388-P-393 | ART, laboratory: ICSI, MESA, TESE . . . . .            | i157 |
| P-394-P-410 | ART . . . . .                                          | i159 |
| P-411-P-421 | ART, stem cell research . . . . .                      | i166 |
| P-422-P-426 | Contraception . . . . .                                | i170 |
| P-427-P-431 | Early pregnancy: basic research . . . . .              | i173 |
| P-432-P-440 | Early pregnancy: clinical aspects . . . . .            | i175 |

*Contents*

|             |                                                 |      |
|-------------|-------------------------------------------------|------|
| P-441-P-445 | Embryology, experimental . . . . .              | i178 |
| P-446-P-448 | Embryology, human . . . . .                     | i180 |
| P-449-P-458 | Endocrinology: basic research . . . . .         | i181 |
| P-459-P-464 | Endocrinology: clinical aspects . . . . .       | i185 |
| P-465-P-475 | Endometriosis: basic research. . . . .          | i188 |
| P-476-P-478 | Endometriosis: clinical aspects. . . . .        | i192 |
| P-479-P-484 | Endometrium . . . . .                           | i193 |
| P-485-P-487 | Epidemiology, demography, terminology . . . . . | i195 |
| P-488       | Ethics and law. . . . .                         | i196 |
| P-489-P-502 | Female fertility: basic research. . . . .       | i196 |
| P-503-P-509 | Female fertility: clinical aspects. . . . .     | i202 |
| P-510-P-511 | Genetics: female . . . . .                      | i204 |
| P-512-P-517 | Genetics: male . . . . .                        | i205 |
| P-518-P-520 | Genetics: PGD . . . . .                         | i207 |
| P-521-P-524 | Genetics: PGS. . . . .                          | i208 |
| P-525-P-529 | Implantation . . . . .                          | i210 |
| P-530-P-541 | Male fertility: basic research . . . . .        | i212 |
| P-542-P-556 | Male fertility: clinical aspects . . . . .      | i217 |
| P-557       | Menopause . . . . .                             | i222 |
| P-558       | Paramedical: laboratory . . . . .               | i223 |
| P-559       | Paramedical: nursing . . . . .                  | i223 |
| P-560-P-571 | Psychology and counseling . . . . .             | i223 |
| P-572-P-575 | Reproductive surgery. . . . .                   | i228 |
